# Supplementary material for: Relationship between Seed Morphological Traits and Ash and Mineral Distribution along the Kernel Using Debranning in Durum Wheats from Different Geographic Sites
Source: PubMed Central journal article supplement (PMC7690802; doi:10.3390/foods9111523), 2020-10-23
Supplement: foods-09-01523-s001.pdf [file foods-09-01523-s001.pdf]

**Table S1** (Supplemental Material). Milling (wholemeal and semolina) and debranned kernel flours (DK1-DK6) of four genotypes over three environments: quantification of ash and macro-elements (a) and micro-elements (b).

a)

| Genotype | Environment | Treatment | Ash     | Na      | K       | P       | Ca      | Mg      | Sum<br>macro- |
|----------|-------------|-----------|---------|---------|---------|---------|---------|---------|---------------|
| Russello | Palermo     | WM        | 2.1     | 411.86  | 5339.82 | 3900.62 | 705.76  | 1359.99 | 14366.7       |
|          |             | DK1       | 1.9     | 311.65  | 5077.14 | 3609.77 | 634.77  | 1328.77 | 13525.6       |
|          |             | DK2       | 1.8     | 290.34  | 4672.18 | 3425.53 | 607.90  | 1203.10 | 12655.0       |
|          |             | DK3       | 1.6     | 277.44  | 4069.31 | 2901.88 | 539.99  | 1017.06 | 11250.4       |
|          |             | DK4       | 1.5     | 273.29  | 3719.02 | 2496.76 | 465.21  | 884.23  | 10085.7       |
|          |             | DK5       | 1.5     | 264.28  | 3783.56 | 2257.94 | 356.38  | 897.18  | 9677.4        |
|          |             | DK6       | 1.3     | 262.76  | 3658.51 | 1528.85 | 231.52  | 854.17  | 8430.2        |
|          | Agrigento   | S         | 0.8     | 221.63  | 2218.37 | 1107.56 | 204.79  | 466.02  | 6098.6        |
|          |             | WM        | 2.1     | 394.39  | 5213.51 | 3237.69 | 830.23  | 1246.24 | 13383.4       |
|          |             | DK1       | 1.9     | 309.72  | 4620.15 | 3223.59 | 803.61  | 1160.07 | 11948.7       |
|          |             | DK2       | 1.7     | 304.99  | 4103.63 | 2561.79 | 794.32  | 979.36  | 11237.3       |
|          |             | DK3       | 1.6     | 284.95  | 3977.39 | 2188.81 | 695.96  | 929.12  | 14365.9       |
|          |             | DK4       | 1.5     | 283.70  | 4075.06 | 1742.51 | 639.32  | 965.96  | 10696.4       |
|          |             | DK5       | 1.5     | 283.23  | 3649.50 | 1486.81 | 640.95  | 811.32  | 9740.0        |
|          | Foggia      | DK6       | 1.3     | 279.17  | 3464.61 | 1135.08 | 530.69  | 764.66  | 8972.5        |
|          |             | S         | 0.9     | 255.70  | 2147.84 | 657.00  | 497.20  | 416.95  | 6726.7        |
|          |             | WM        | 2.0     | 297.05  | 4631.39 | 2792.94 | 816.98  | 1247.69 | 13489.8       |
|          |             | DK1       | 1.8     | 278.51  | 3975.27 | 2462.62 | 741.65  | 1059.51 | 12178.7       |
|          |             | DK2       | 1.6     | 278.04  | 3736.21 | 2173.66 | 748.37  | 973.70  | 11543.9       |
|          |             | DK3       | 1.5     | 277.07  | 3501.61 | 2022.03 | 713.08  | 921.32  | 11024.1       |
|          |             | DK4       | 1.4     | 245.24  | 3214.52 | 1576.72 | 705.55  | 792.49  | 10069.3       |
|          | Palermo     | DK5       | 1.3     | 243.34  | 2846.49 | 1502.33 | 617.23  | 725.64  | 9458.6        |
|          |             | DK6       | 1.2     | 241.53  | 2899.22 | 1272.48 | 575.83  | 670.09  | 9090.5        |
|          |             | S         | 0.9     | 236.52  | 2168.90 | 603.41  | 568.72  | 437.07  | 7273.3        |
| WM       |             | 2.0       | 279.22  | 5290.63 | 3936.82 | 652.32  | 1438.88 | 14837.3 |               |
| DK1      |             | 1.7       | 278.14  | 4250.52 | 2800.01 | 595.47  | 1160.98 | 12292.8 |               |
| DK2      |             | 1.5       | 272.18  | 3816.69 | 2143.63 | 597.69  | 1029.11 | 10854.4 |               |
| DK3      |             | 1.4       | 268.07  | 3458.19 | 2007.06 | 489.99  | 860.24  | 10021.6 |               |
| DK4      | 1.2         | 257.72    | 3312.82 | 1848.79 | 441.07  | 810.31  | 9541.1  |         |               |
| DK5      | 1.2         | 256.59    | 3097.39 | 1761.25 | 438.09  | 720.01  | 8989.7  |         |               |
| DK6      | 1.1         | 255.31    | 2888.08 | 1526.39 | 425.17  | 663.10  | 8456.5  |         |               |



|  |           |     |     |        |         |         |        |         |         |
|--|-----------|-----|-----|--------|---------|---------|--------|---------|---------|
|  |           | DK5 | 1.4 | 265.09 | 3017.98 | 2984.15 | 285.38 | 861.56  | 8970.2  |
|  |           | DK6 | 1.3 | 264.85 | 2921.17 | 2526.55 | 188.75 | 780.81  | 8228.1  |
|  |           | S   | 0.7 | 261.41 | 1467.37 | 1449.31 | 174.83 | 327.81  | 5110.2  |
|  | Palermo   | WM  | 2.3 | 432.07 | 5265.93 | 3870.67 | 596.59 | 1408.58 | 15161.4 |
|  |           | DK1 | 1.9 | 404.57 | 4673.99 | 3640.20 | 425.41 | 1230.35 | 13885.3 |
|  |           | DK2 | 1.8 | 372.49 | 4089.46 | 3245.53 | 344.35 | 1122.59 | 12455.2 |
|  |           | DK3 | 1.6 | 358.57 | 3643.15 | 2973.03 | 304.61 | 969.54  | 11473.7 |
|  |           | DK4 | 1.5 | 355.60 | 3503.38 | 2495.48 | 283.97 | 957.84  | 10697.2 |
|  |           | DK5 | 1.4 | 348.07 | 3242.21 | 2275.59 | 233.05 | 837.70  | 9719.4  |
|  | Agrigento | DK6 | 1.2 | 342.19 | 2852.72 | 1977.26 | 222.41 | 703.33  | 8762.1  |
|  |           | S   | 1.0 | 327.59 | 2126.6  | 1409.85 | 200.27 | 552.10  | 7211.9  |
|  |           | WM  | 2.0 | 395.94 | 4981.69 | 3374.40 | 485.56 | 1273.12 | 14876.2 |
|  |           | DK1 | 1.8 | 392.05 | 4395.09 | 3264.36 | 325.00 | 1173.76 | 13492.2 |
|  |           | DK2 | 1.6 | 387.31 | 3594.53 | 2390.87 | 255.59 | 936.47  | 11394.6 |
|  |           | DK3 | 1.4 | 363.76 | 3422.17 | 2261.94 | 263.48 | 859.57  | 10979.1 |
|  | Foggia    | DK4 | 1.3 | 362.83 | 2939.56 | 1733.82 | 254.87 | 716.46  | 9723.3  |
|  |           | DK5 | 1.2 | 362.07 | 2780.25 | 1642.40 | 221.43 | 657.01  | 9338.5  |
|  |           | DK6 | 1.1 | 358.65 | 2782.38 | 1661.38 | 201.58 | 662.47  | 9269.9  |
|  |           | S   | 0.8 | 341.53 | 1843.21 | 810.56  | 164.96 | 396.42  | 7092.4  |
|  |           | WM  | 2.1 | 457.55 | 4667.34 | 3252.42 | 453.78 | 1242.53 | 13905.7 |
|  |           | DK1 | 1.8 | 400.18 | 4368.12 | 3005.36 | 451.49 | 1129.86 | 12918.4 |
|  |           | DK2 | 1.5 | 397.03 | 3434.82 | 2244.85 | 368.14 | 895.50  | 10794.1 |
|  |           | DK3 | 1.3 | 376.95 | 3091.21 | 1804.79 | 334.25 | 773.08  | 9726.4  |
|  |           | DK4 | 1.2 | 376.71 | 2818.14 | 1635.46 | 308.45 | 704.28  | 9181.9  |
|  |           | DK5 | 1.1 | 365.37 | 2704.08 | 1480.09 | 255.77 | 651.11  | 8745.5  |
|  |           | DK6 | 1.1 | 361.98 | 2581.32 | 1285.91 | 196.56 | 613.46  | 8313.1  |
|  |           | S   | 0.8 | 340.80 | 1992.2  | 781.11  | 130.78 | 476.85  | 6985.9  |

| Analysis of variance | <i>F</i> | <i>p</i> | <i>F</i> | <i>p</i> | <i>F</i> | <i>p</i> | <i>F</i> | <i>p</i> | <i>F</i> | <i>p</i> | <i>F</i> | <i>p</i> | <i>F</i> | <i>p</i> |
|----------------------|----------|----------|----------|----------|----------|----------|----------|----------|----------|----------|----------|----------|----------|----------|
| G                    | 256.6    | ***      | 723.8    | ***      | 53.3     | ***      | 86.7     | ***      | 623.7    | ***      | 143.5    | ***      | 51.9     | ***      |
| E                    | 251.5    | ***      | 1.7      | ns       | 124.8    | ***      | 96.8     | ***      | 8.8      | ***      | 170.9    | ***      | 51.8     | ***      |
| T                    | 3023     | ***      | 106.5    | ***      | 897.1    | ***      | 452.5    | ***      | 214.8    | ***      | 637.2    | ***      | 1086.8   | ***      |
| G x E                | 46.1     | ***      | 19.5     | ***      | 21.8     | ***      | 80.6     | ***      | 138.4    | ***      | 2.9      | *        | 5.8      | ***      |
| G x T                | 44.1     | ***      | 6.5      | ***      | 11.1     | ***      | 8.4      | ***      | 5.6      | ***      | 11.7     | ***      | 13.0     | ***      |
| E x T                | 3.2      | ***      | 1.5      | ns       | 4.4      | ***      | 1.0      | ns       | 3.7      | ***      | 2.5      | **       | 3.5      | ***      |
| G x E x T            | 2.1      | **       | 1.9      | **       | 2.2      | ***      | 2.3      | ***      | 2.3      | ***      | 1.8      | *        | 2.5      | ***      |

b)

| Genotype     | Environment | Treatment | Mn    | Fe    | Cu    | Zn    | Mo    | Sum micro- |
|--------------|-------------|-----------|-------|-------|-------|-------|-------|------------|
| Russello     | Palermo     | WM        | 38.73 | 55.06 | 7.29  | 34.41 | 1.59  | 137.1      |
|              |             | DK1       | 32.31 | 49.74 | 6.87  | 33.08 | 1.71  | 123.7      |
|              |             | DK2       | 28.26 | 48.18 | 6.42  | 29.23 | 1.59  | 113.7      |
|              |             | DK3       | 24.85 | 43.45 | 6.31  | 28.40 | 1.49  | 104.5      |
|              |             | DK4       | 24.86 | 43.15 | 5.90  | 27.41 | 1.49  | 102.8      |
|              |             | DK5       | 21.47 | 39.43 | 5.73  | 26.33 | 1.47  | 94.4       |
|              |             | DK6       | 21.13 | 36.32 | 4.81  | 22.97 | 1.40  | 86.6       |
|              | Agrigento   | S         | 8.12  | 28.54 | 4.29  | 15.61 | 1.38  | 57.9       |
|              |             | WM        | 31.16 | 50.36 | 5.99  | 42.64 | 5.31  | 135.5      |
|              |             | DK1       | 23.72 | 41.38 | 5.64  | 34.00 | 4.92  | 109.7      |
|              |             | DK2       | 20.28 | 37.24 | 5.21  | 31.73 | 4.84  | 99.3       |
|              |             | DK3       | 20.06 | 32.33 | 5.12  | 30.52 | 4.68  | 92.7       |
|              |             | DK4       | 19.67 | 30.03 | 5.00  | 27.57 | 4.54  | 86.8       |
|              |             | DK5       | 17.61 | 30.04 | 4.22  | 25.68 | 4.45  | 82.0       |
|              | Foggia      | DK6       | 16.21 | 24.23 | 4.05  | 22.04 | 4.34  | 70.9       |
|              |             | S         | 6.77  | 22.31 | 3.33  | 15.38 | 3.77  | 51.6       |
|              |             | WM        | 48.29 | 35.98 | 4.96  | 39.90 | 2.35  | 131.5      |
|              |             | DK1       | 36.47 | 31.87 | 5.24  | 33.04 | 2.20  | 108.8      |
|              |             | DK2       | 32.02 | 28.64 | 5.00  | 31.48 | 2.18  | 99.3       |
|              |             | DK3       | 31.41 | 28.38 | 4.52  | 28.06 | 2.13  | 94.5       |
|              |             | DK4       | 28.54 | 27.69 | 3.88  | 21.54 | 2.03  | 83.7       |
| Palermo      | DK5         | 26.91     | 24.87 | 3.73  | 21.48 | 1.97  | 79.0  |            |
|              | DK6         | 25.92     | 23.48 | 3.48  | 18.94 | 1.91  | 73.7  |            |
|              | S           | 11.66     | 22.98 | 3.16  | 11.74 | 1.83  | 54.1  |            |
|              | WM          | 36.04     | 57.88 | 6.95  | 43.08 | 0.68  | 144.6 |            |
|              | DK1         | 29.67     | 49.77 | 6.05  | 33.02 | 0.58  | 119.1 |            |
|              | DK2         | 22.68     | 48.00 | 5.87  | 32.10 | 0.55  | 109.2 |            |
|              | DK3         | 21.42     | 40.37 | 5.56  | 28.23 | 0.55  | 96.1  |            |
| Perciasacchi | Agrigento   | DK4       | 19.35 | 38.76 | 5.18  | 24.34 | 0.50  | 88.1       |
|              |             | DK5       | 19.42 | 35.75 | 4.69  | 23.80 | 0.45  | 84.1       |
|              |             | DK6       | 19.94 | 32.04 | 4.40  | 18.24 | 0.42  | 75.0       |
|              |             | S         | 12.22 | 31.36 | 4.18  | 15.14 | 0.39  | 63.3       |
|              |             | WM        | 24.74 | 39.77 | 5.61  | 54.44 | 4.23  | 128.8      |

|         |           |     |       |       |      |       |      |       |
|---------|-----------|-----|-------|-------|------|-------|------|-------|
|         |           | DK1 | 20.83 | 33.40 | 5.23 | 42.58 | 4.05 | 106.1 |
|         |           | DK2 | 16.85 | 29.25 | 5.23 | 39.57 | 3.94 | 94.8  |
|         |           | DK3 | 14.54 | 30.37 | 5.01 | 38.71 | 3.84 | 92.5  |
|         |           | DK4 | 16.33 | 28.45 | 5.06 | 38.53 | 3.85 | 92.2  |
|         |           | DK5 | 16.18 | 28.08 | 4.55 | 36.80 | 3.77 | 89.4  |
|         |           | DK6 | 14.24 | 23.63 | 4.47 | 28.15 | 3.74 | 74.2  |
|         |           | S   | 7.77  | 20.62 | 3.53 | 21.32 | 3.64 | 56.9  |
|         | Foggia    | WM  | 38.61 | 43.92 | 5.48 | 57.54 | 1.76 | 147.3 |
|         |           | DK1 | 31.56 | 32.5  | 4.82 | 44.31 | 1.49 | 114.8 |
|         |           | DK2 | 31.30 | 30.81 | 4.80 | 40.64 | 1.40 | 109.0 |
|         |           | DK3 | 25.01 | 28.11 | 4.53 | 35.66 | 1.37 | 94.7  |
|         |           | DK4 | 24.83 | 22.58 | 3.72 | 29.28 | 1.33 | 81.7  |
|         |           | DK5 | 24.18 | 20.93 | 3.65 | 28.85 | 1.32 | 78.9  |
|         |           | DK6 | 22.88 | 19.84 | 3.60 | 27.61 | 1.25 | 75.2  |
|         |           | S   | 13.64 | 16.72 | 3.39 | 22.30 | 1.26 | 57.3  |
|         | Palermo   | WM  | 44.48 | 58.79 | 7.18 | 50.82 | 0.93 | 162.2 |
|         |           | DK1 | 36.29 | 51.20 | 6.96 | 40.18 | 0.88 | 135.5 |
|         |           | DK2 | 33.40 | 46.66 | 6.53 | 36.57 | 0.79 | 124.0 |
|         |           | DK3 | 29.18 | 46.51 | 6.43 | 36.24 | 0.70 | 119.1 |
|         |           | DK4 | 26.91 | 46.39 | 6.17 | 35.10 | 0.68 | 115.2 |
|         |           | DK5 | 24.41 | 41.01 | 6.06 | 25.01 | 0.65 | 97.1  |
|         |           | DK6 | 27.29 | 37.06 | 5.98 | 18.33 | 0.64 | 89.3  |
|         |           | S   | 7.30  | 28.62 | 4.12 | 16.80 | 0.50 | 57.3  |
| Timilia | Agrigento | WM  | 36.04 | 47.21 | 6.68 | 44.74 | 3.38 | 138.1 |
|         |           | DK1 | 28.82 | 43.43 | 6.19 | 45.12 | 3.25 | 126.8 |
|         |           | DK2 | 25.19 | 41.84 | 5.89 | 35.18 | 3.03 | 111.1 |
|         |           | DK3 | 20.15 | 33.62 | 5.39 | 34.33 | 3.02 | 96.5  |
|         |           | DK4 | 21.25 | 29.99 | 5.13 | 28.75 | 2.70 | 87.8  |
|         |           | DK5 | 17.49 | 26.49 | 4.89 | 22.93 | 2.67 | 74.5  |
|         |           | DK6 | 18.00 | 25.67 | 4.70 | 22.96 | 2.45 | 73.8  |
|         |           | S   | 5.90  | 14.45 | 2.94 | 16.87 | 2.06 | 42.2  |
|         | Foggia    | WM  | 57.40 | 49.11 | 5.60 | 50.20 | 1.87 | 164.2 |
|         |           | DK1 | 44.61 | 44.67 | 5.60 | 39.13 | 1.85 | 135.9 |
|         |           | DK2 | 41.85 | 42.43 | 5.22 | 38.76 | 1.75 | 130.0 |

|          |           |     |       |       |      |       |      |       |
|----------|-----------|-----|-------|-------|------|-------|------|-------|
|          |           | DK3 | 37.56 | 38.95 | 5.00 | 37.06 | 1.73 | 120.3 |
|          |           | DK4 | 33.93 | 34.31 | 5.00 | 36.60 | 1.65 | 111.5 |
|          |           | DK5 | 33.53 | 32.18 | 4.84 | 29.85 | 1.65 | 102.0 |
|          |           | DK6 | 28.25 | 24.95 | 4.51 | 26.91 | 1.51 | 86.1  |
|          |           | S   | 9.66  | 21.97 | 3.19 | 13.71 | 1.26 | 49.8  |
|          | Palermo   | WM  | 38.41 | 54.95 | 7.52 | 44.08 | 0.84 | 145.8 |
|          |           | DK1 | 31.27 | 45.90 | 6.64 | 33.31 | 0.72 | 111.5 |
|          |           | DK2 | 25.58 | 42.75 | 6.14 | 27.57 | 0.70 | 102.0 |
|          |           | DK3 | 23.37 | 40.36 | 5.89 | 25.69 | 0.69 | 86.1  |
|          |           | DK4 | 23.60 | 35.89 | 4.81 | 24.81 | 0.65 | 89.8  |
|          |           | DK5 | 22.43 | 28.18 | 4.88 | 24.58 | 0.64 | 80.7  |
|          |           | DK6 | 24.36 | 21.03 | 4.55 | 17.67 | 0.64 | 68.3  |
|          |           | S   | 11.04 | 17.55 | 3.62 | 14.27 | 0.60 | 47.1  |
| Cappelli | Agrigento | WM  | 31.74 | 52.30 | 6.17 | 53.80 | 3.92 | 147.9 |
|          |           | DK1 | 23.83 | 41.01 | 5.00 | 39.21 | 3.67 | 112.7 |
|          |           | DK2 | 19.41 | 35.36 | 4.23 | 29.19 | 3.63 | 91.8  |
|          |           | DK3 | 18.77 | 31.60 | 4.22 | 24.45 | 3.35 | 82.4  |
|          |           | DK4 | 18.46 | 27.39 | 3.73 | 19.35 | 3.11 | 72.0  |
|          |           | DK5 | 16.77 | 26.32 | 3.62 | 17.79 | 3.07 | 67.6  |
|          |           | DK6 | 14.87 | 23.52 | 3.43 | 14.69 | 2.90 | 59.4  |
|          |           | S   | 5.31  | 15.86 | 2.34 | 7.35  | 2.80 | 33.7  |
|          | Foggia    | WM  | 49.40 | 44.07 | 7.35 | 58.00 | 1.63 | 160.4 |
|          |           | DK1 | 40.26 | 37.10 | 6.07 | 40.91 | 1.55 | 125.9 |
|          |           | DK2 | 34.72 | 29.40 | 4.47 | 31.75 | 1.48 | 101.8 |
|          |           | DK3 | 32.98 | 25.90 | 4.51 | 24.53 | 1.46 | 89.4  |
|          |           | DK4 | 28.66 | 22.17 | 3.87 | 20.09 | 1.43 | 76.2  |
|          |           | DK5 | 26.47 | 19.33 | 3.17 | 18.05 | 1.32 | 68.3  |
|          |           | DK6 | 25.71 | 18.56 | 3.36 | 15.06 | 1.31 | 64.0  |
|          |           | S   | 10.89 | 13.84 | 2.68 | 12.99 | 1.29 | 41.7  |

| Analysis of variance | <i>F</i> | <i>p</i> | <i>F</i> | <i>p</i> | <i>F</i> | <i>p</i> | <i>F</i> | <i>p</i> | <i>F</i> | <i>p</i> | <i>F</i> | <i>p</i> |
|----------------------|----------|----------|----------|----------|----------|----------|----------|----------|----------|----------|----------|----------|
| G                    | 73.8     | ***      | 19.2     | ***      | 20.6     | ***      | 131.6    | ***      | 930.6    | ***      | 66.2     | ***      |
| E                    | 439.8    | ***      | 124.4    | ***      | 121.0    | ***      | 28.6     | ***      | 12156.4  | ***      | 57.7     | ***      |
| T                    | 356.6    | ***      | 94.5     | ***      | 88.0     | ***      | 534.3    | ***      | 93.2     | ***      | 537      | ***      |
| G x E                | 3.0      | **       | 5.6      | ***      | 4.5      | ***      | 30.9     | ***      | 182.3    | ***      | 9.3      | ***      |

|           |     |     |     |    |     |     |      |     |      |     |     |     |
|-----------|-----|-----|-----|----|-----|-----|------|-----|------|-----|-----|-----|
| G x T     | 4.9 | *** | 1.3 | ns | 2.9 | *** | 11.1 | *** | 2.3  | **  | 5.9 | *** |
| E x T     | 6.1 | *** | 0.6 | ns | 0.5 | ns  | 4.8  | *** | 14.4 | *** | 12  | ns  |
| G x E x T | 0.8 | ns  | 0.7 | ns | 0.6 | ns  | 3.4  | *** | 1.4  | ns  | 1.2 | ns  |

G, E, T and G x E, G x T, G x E x T are measured at  $p < 0.01$ .

Ns, not significant; \*, \*\* and \*\*\* represents significance at  $P < 0.05$ ,  $P < 0.01$  and  $P < 0.001$ , respectively.

WM, wholemeal; S, semolina; DK-1 to DK-6, debranned kernels.
